# Supplementary material
Source: HighWire-hosted journal article supplement (https://jnis.bmj.com/highwire/filestream/169714/field_highwire_adjunct_files/0/neurintsurg-2021-017671supp001_data_supplement.pdf)
Supplement: neurintsurg-2021-017671supp001_data_supplement.pdf [file neurintsurg-2021-017671supp001_data_supplement.pdf]

**Table S1** Institutions and with IRB/EC approval information and clot collecting capacity

| <b>Institution Name &amp; Address</b>                                                                                   | <b>IRB/EC Name &amp; Address</b>                                                                                          | <b>Clot Collection</b> |
|-------------------------------------------------------------------------------------------------------------------------|---------------------------------------------------------------------------------------------------------------------------|------------------------|
| Baptist Medical Center<br>Lyerly Neurosurgery<br>800 Prudential Drive,<br>Tower B, 11th Floor<br>Jacksonville, FL 32207 | The Institutional Review Board<br>(IRB) of Baptist Health<br>820 Prudential Drive, Suite 413<br>Jacksonville, FL 32207    | Yes                    |
| Mount Sinai Hospital<br>1450 Madison Avenue<br>New York, NY 10029                                                       | Program for the Protection of<br>Human Subjects<br>One Gustave L Levy Place<br>Box 1081<br>New York, NY 10029             | Yes                    |
| University of Buffalo<br>Medical Center<br>100 High Street, Suite<br>4B<br>Buffalo, NY 14203                            | Western Institutional Review<br>Board<br>1019 39th Avenue SE, Suite 120<br>Puyallup, WA 98374-2115                        | Yes                    |
| Jackson Memorial<br>Hospital<br>1611 NW 12 <sup>th</sup> Ave<br>Miami, FL 33126                                         | University of Miami IRB<br>1400 NW 10 <sup>th</sup> Ave, 12 <sup>th</sup> Fl<br>(M809)<br>Miami, FL 33136                 | No                     |
| Norton Neuroscience<br>Institute<br>4950 Norton<br>Healthcare Blvd Suite<br>205, Louisville, KY<br>40241                | Western Institutional Review<br>Board<br>1019 39th Avenue SE, Suite 120<br>Puyallup, WA 98374-2115                        | No                     |
| University of<br>Massachusetts Medical<br>Center<br>55 N Lake Avenue<br>Worcester, MA 01655                             | University of Massachusetts, IRB<br>362 Plantation Street,<br>Ambulatory Care Center, 7th<br>Floor<br>Worcester, MA 01655 | No                     |
| Oregon Health and<br>Science University<br>3181 SW Sam Jackson<br>Park Road<br>Portland, OR 97239                       | OHSU IRB<br>3181 SW Sam Jackson Park<br>Road<br>Portland, Oregon 97239                                                    | Yes                    |
| Cleveland Clinic Main<br>Campus<br>9500 Euclid Avenue<br>Cleveland, OH 44195                                            | Cleveland Clinic IRB<br>9500 Euclid Avenue<br>Cleveland, OH 44195                                                         | Yes                    |
| Vanderbilt University<br>Medical Center<br>1211 Medical Center<br>Dr<br>Nashville, TN 37232                             | Human Research Protections<br>Program<br>3319 West End Ave, Suite 600<br>Nashville, TN 37203                              | Yes                    |
| Mercy Health<br>Neuroscience<br>2222 Cherry St M200,<br>Toledo, OH 43608                                                | Mercy Health North LLC IRB<br>2200 Jefferson Ave 4 <sup>th</sup> FL<br>Toledo, OH 43604                                   | Yes                    |

|                                                                                                        |                                                                                                   |     |
|--------------------------------------------------------------------------------------------------------|---------------------------------------------------------------------------------------------------|-----|
| Fort Sanders Regional Medical Center, LLC<br>602 South Gay Street<br>Suite 201C<br>Knoxville, TN 37902 | Covenant Health IRB<br>280 Fort Sanders West Blvd<br>Building 4, Suite 204<br>Knoxville, TN 37922 | Yes |
| Los Robles Hospital and Medical Center<br>215 W Janss Rd,<br>Thousand Oaks, CA 91360                   | Western Institutional Review Board<br>1019 39th Avenue SE, Suite 120<br>Puyallup, WA 98374-2115   | Yes |
| Semmes-Murphey<br>6325 Humphreys Blvd<br>Memphis, TN 38120                                             | University of Tennessee Health Science Center<br>910 Madison Avenue<br>Memphis, TN 38163          | No  |
| Texas Stroke Institute<br>Medical City Plano<br>3901 W 15th St, Plano, TX 75075                        | Medical City Plano IRB<br>3901 W 15th St, Plano, TX 75075                                         | Yes |
| OhioHealth Research Institute<br><br>3545 Olentangy River Rd # 301 Columbus, OH 43214                  | Western Institutional Review Board<br>1019 39th Avenue SE, Suite 120<br>Puyallup, WA 98374-2115   | Yes |
| Grady Memorial Hospital<br>80 Jesse Hill Jr Dr SE,<br>Atlanta, GA 30303                                | Western Institutional Review Board<br>1019 39th Avenue SE, Suite 120<br>Puyallup, WA 98374-2115   | Yes |
| Jefferson Hospital for Neuroscience<br>900 Walnut St,<br>Philadelphia, PA 19107                        | Western Institutional Review Board<br>1019 39th Avenue SE, Suite 120<br>Puyallup, WA 98374-2115   | Yes |
| University of Tennessee Medical Center<br>1924 Alcoa Hwy,<br>Knoxville, TN 37920                       | Sterling IRB<br>6300 Powers Ferry Rd<br>Suite 600-351<br>Atlanta, GA 30339                        | Yes |
| Wellstar Kennestone Hospital<br>677 Church St,<br>Marietta, GA 30060                                   | Sterling IRB<br>6300 Powers Ferry Rd<br>Suite 600-351<br>Atlanta, GA 30339                        | Yes |
| Memorial Regional Hospital<br>3501 Johnson Street<br>Hollywood, FL 33021                               | Western Institutional Review Board<br>1019 39th Avenue SE, Suite 120<br>Puyallup, WA 98374-2115   | Yes |
| Geisinger Medical Center<br>100 N Academy Ave,<br>Danville, PA 17822                                   | Geisinger IRB<br>100 N Academy Ave, Danville,<br>PA 17822                                         | No  |
| Banner Desert Medical Center<br>1520 S. Dobson Rd<br>Ste 203                                           | Sterling IRB<br>6300 Powers Ferry Rd<br>Suite 600-351<br>Atlanta, GA 30339                        | Yes |

|                                                                                                          |                                                                                                                                                             |     |
|----------------------------------------------------------------------------------------------------------|-------------------------------------------------------------------------------------------------------------------------------------------------------------|-----|
| Mesa, AZ 85202                                                                                           |                                                                                                                                                             |     |
| Barrow Neurological Institute<br>350 West Thomas Rd<br>Phoenix, AZ 85013                                 | Sterling IRB<br>6300 Powers Ferry Rd<br>Suite 600-351<br>Atlanta, GA 30339                                                                                  | Yes |
| Washington University in St. Louis<br>660 S. Euclid Ave,<br>Campus Box 8057, St. Louis, MO, 63118        | Washington University in St. Louis Human Research Protection Office<br>660 S. Euclid Ave, Campus Box 8089, St. Louis, MO 63110                              | Yes |
| Advent Health Orlando<br>601 E. Rollins Ave,<br>Mailbox 99,<br>Neuroscience Research, Orlando, FL, 32803 | Advent Health Orlando IRB<br>800 N. Magnolia Ave, Suite 500<br>Orlando, FL 32803                                                                            | Yes |
| Vidant Medical Center<br>2325 Stantonsburg Rd,<br>Greenville, NC, 27834                                  | East Carolina University IRB<br>4N-64 Brody Medical Sciences Building<br>600 Moye Blvd<br>Greenville, NC 27834                                              | No  |
| Memorial Hermann – Texas Medical Center<br>6411 Fannin St<br>Houston, TX 77030                           | UTHealth<br>University of Texas IRB<br>6410 Fannin St, Suite 1100<br>Houston, TX 77030                                                                      | Yes |
| The University of Alabama at Birmingham<br>1720 Second Avenue South, FOT 1007,<br>Birmingham, AL, 35294  | Sterling IRB<br>6300 Powers Ferry Rd<br>Suite 600-351<br>Atlanta, GA 30339                                                                                  | Yes |
| University of Mainz<br>Langenbeckstraße 1,<br>55101 Mainz,<br>Germany                                    | Ethikkommission Der Landesärztekammer Rheinland-Pfalz<br>Deutschhausplatz 3<br>55116 Mainz, Germany                                                         | Yes |
| AZ Groeninge<br>President Kennedylaan 4<br>8500 Kortrijk<br>Belgium                                      | Comissie Medische Ethiek<br>AZ Groeninge<br>President Kennedylaan 4<br>8500 Kortrijk<br>Belgium                                                             | No  |
| Hopital Roger Salengro – CHU Lille<br>Avenue du Professeur Emile Laine<br>59037 Lille, France            | Comite de Protection des Personnes Sud-Est III/ CPP Sud-Est II<br>Groupement Hospitalier Est – Batiment Pinel<br>59 Boulevard Pinel<br>69500 Bron FranceN/A | No  |

|                                                                                                                  |                                                                                                                                                                |     |
|------------------------------------------------------------------------------------------------------------------|----------------------------------------------------------------------------------------------------------------------------------------------------------------|-----|
| Universitaetsklinikum<br>Hamburg Eppendorf<br>W14 Martinistrasse 52<br>20246 Hamburg<br>Germany                  | Ethik-Kommission der<br>Arztekammer Hamburg<br>Weidestrasse 122 b<br>22083 Hamburg Germany                                                                     | Yes |
| Klinikum Dortmund<br>gGmbH<br>Beurhausstrasse 40<br>44137 Dortmund<br>Germany                                    | Ethik-Kommission der<br>Arztekammer Westfalen-Lippe<br>und der Westfälischen Wilhelms<br>Universität Munster<br>Gartenstraße 210-214<br>48147 Munster, Germany | Yes |
| Universitätsklinikum<br>des Saarlandes,<br><br>Kirrberger Strasse<br>Gebäude 90, Homburg<br>Saar, 66421, Germany | Ethik-Kommission bei der<br>Ärztekammer des Saarlandes,<br><br>Faktoreistraße 4, 66111<br>Saarbrücken,<br>Germany                                              | No  |
| Hadassah Medical<br>Center,<br><br>Kiryat Hadassah, POB<br>12000, Jerusalem,<br>91120, Israel                    | EC Hadassah Hebrew University<br>Medical Center,<br><br>Einkerem, POB 12000,<br>Jerusalem, 91120, Israel                                                       | No  |
| Charing Cross<br>Hospital,<br><br>Fulham Palace Road,<br>Hammersmith,<br>London, W6 8RF,<br>United Kingdom       | NRES Committee London -<br>South East,<br><br>Barlow House, 3rd Floor, 4<br>Minshull Street, Manchester, M1<br>3DZ, United Kingdom                             | Yes |
